# Supplementary material
Source: publisher site journal article supplement (https://www.dovepress.com/article/460259)
Supplement: Supplementary file 1 [file get_supplementary_file.php]

**
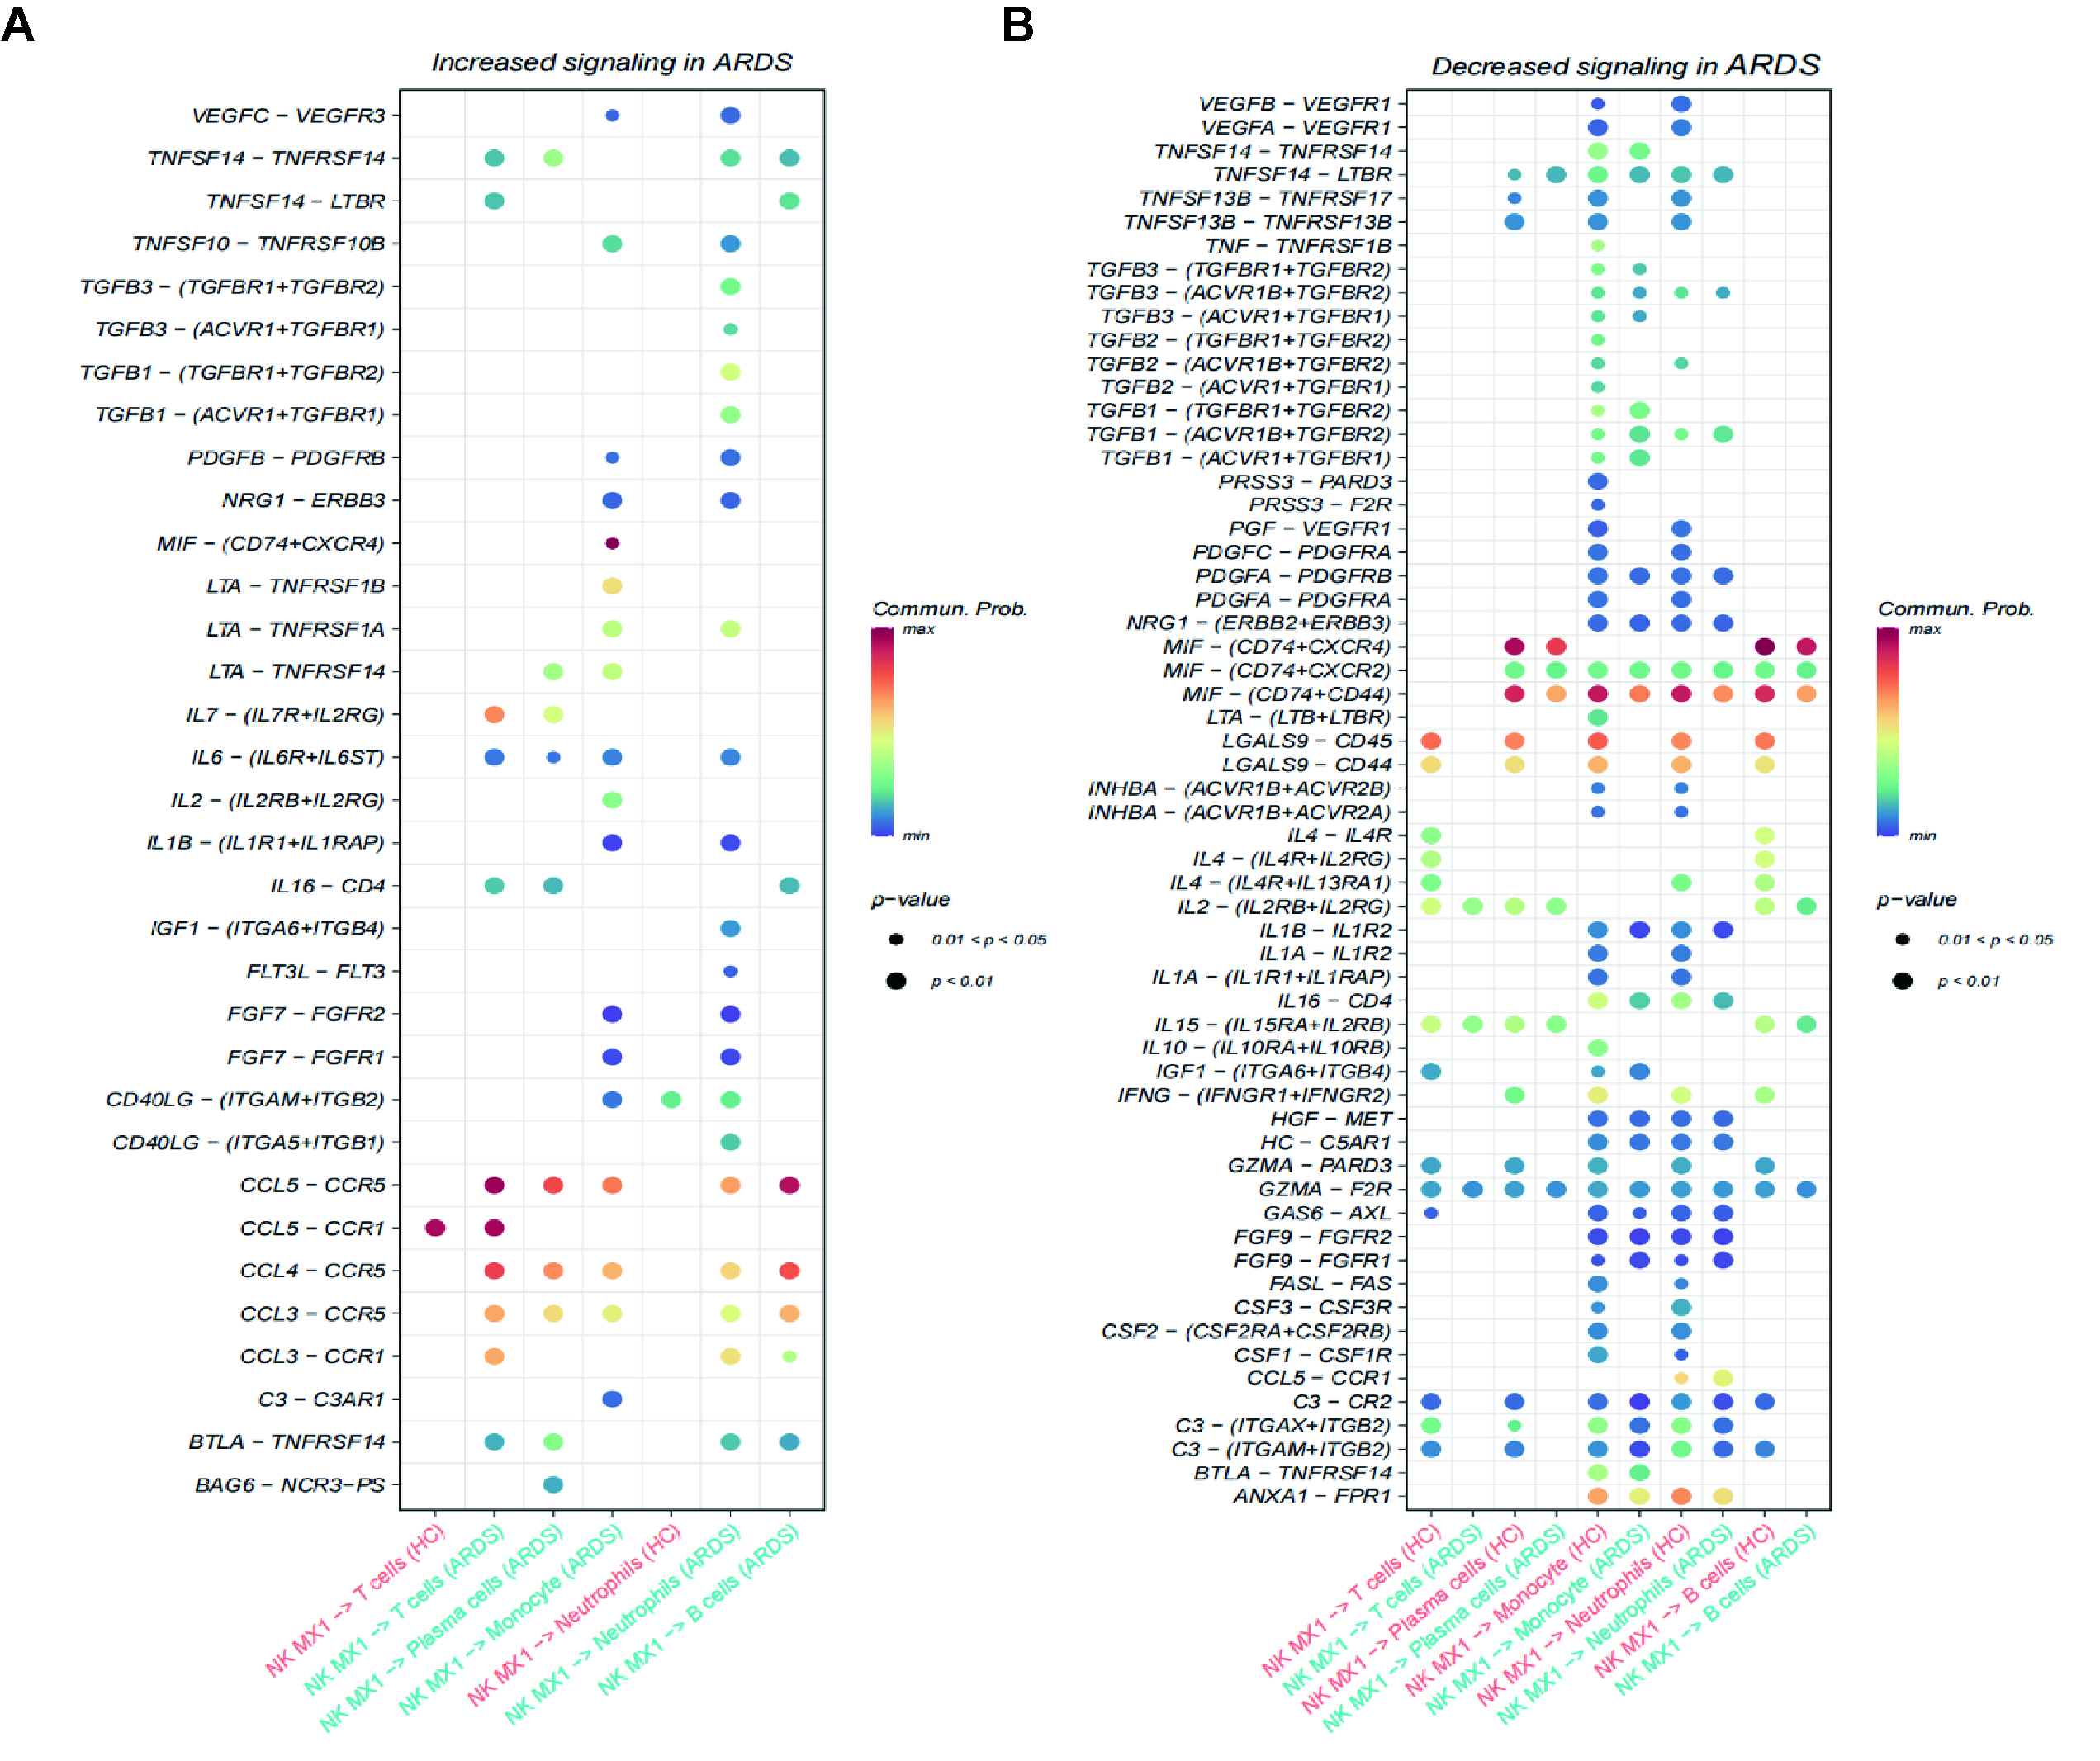
**

Fig. S1 A-B The communicated probability and related P values of the selected ligand-receptor interactions between MX1+NK cells and other cells within the ARDS. Dot color reflects communication probabilities and dot size represents computed p-values. P < 0.05 refers to the significant ligand-receptor interaction.

**Supplementary table 1. Characteristics of septic patients according to ARDS**

|  | **Sepsis without ARDS**  **(n=52)** | **Sepsis with ARDS (n=63)** | ***p*** |
| --- | --- | --- | --- |
| Age (year, mean±SD) | 68±12 | 67±16 | 0.569 |
| Male, n (%) | 26 (0.50) | 49 (0.78) | 0.003 |
| BMI (kg/m2, mean±SD) | 23.75±5.31 | 24.34±4.01 | 0.498 |
| Source of Infection, n (%) |  |  | <0.0001 |
| Lung | 8 (0.15) | 33 (0.52) |  |
| Abdomen | 27 (0.52) | 25 (0.40) |  |
| Urinary | 10 (0.19) | 0 (0) |  |
| Other | 7 (0.13) | 5 (0.08) |  |
| SOFA score, mean±SD | 7±3 | 10±5 | 0.001 |
| APACHE II score, mean±SD | 19±7 | 22±9 | 0.015 |
| 28-day mortality | 8 (0.15) | 23 (0.37) | 0.012 |

**BMI: Body Mass Index; ARDS:Acute Respiratory Distress Syndrome; SOFA: Sequential Organ Failure Assessment; APACHE: Acute Physiology and Chronic Health Evaluation.**

**Supplementary table 2: Clinical characteristics of patients detecting MX1+NK cells**

| **Patient** | **Age** | **Gender** | **hosptial LOS (Days)** | **ICU LOS (Days)** | **Intubated** | **ARDS** | **Sepsis Source** | **SOFA** |
| --- | --- | --- | --- | --- | --- | --- | --- | --- |
| #1 | 87 | male | 3 | 3 | Yes | Yes | Respiratory | 14 |
| #2 | 73 | male | 2 | 2 | Yes | Yes | Respiratory | 13 |
| #3 | 77 | male | 15 | 15 | Yes | Yes | Respiratory | 9 |
| #4 | 74 | male | 23 | 23 | Yes | Yes | Abdomen | 14 |
| #5 | 73 | female | 17 | 17 | Yes | Yes | Respiratory | 3 |
| #6 | 68 | female | 10 | 10 | NO | NO | Urine | 10 |
| #7 | 88 | female | 13 | 13 | NO | NO | Urine | 2 |
| #8 | 85 | male | 4 | 4 | NO | NO | Abdomen | 9 |
| #9 | 69 | female | 7 | 7 | Yes | NO | blood | 7 |
| #10 | 78 | male | 43 | 43 | Yes | NO | Respiratory | 6 |
| #11 | 82 | male | 12 | 12 | Yes | NO | Respiratory | 8 |

**LOS: Length of Stay; ARDS: Acute Respiratory Distress Syndrome; SOFA: Sequential Organ Failure Assessment; ICU: Intensive Care Unit**
